# Supplementary material
Source: PubMed Central journal article supplement (PMC4646850)
Supplement: 13280_2015_649_MOESM1_ESM.pdf [file 13280_2015_649_MOESM1_ESM.pdf]

***AMBIO***

Electronic Supplementary Material

*This supplementary material has not been peer reviewed.*

**Title: Decline of traditional rice farming constrains the recovery of endangered crested ibis**

### **Key Mechanism of the Expert System**

Let  $A$  be an item of evidence known at a given location, and let us set up a hypothesis ( $B_j$ ) that the land use class  $j$  occurs at this location. The Bayes' rule can then be given as:

$$P(B_j | A) = \frac{P(A | B_j)P(B_j)}{\sum_{i=1}^n P(A | B_i)P(B_i)}; i = 1, 2, \dots, n \quad (1)$$

where  $P(A|B_j)$  is the conditional probability that a certain grid cell location has an item of evidence ( $A$ ) given  $B_j$  (see Table S1);  $P(B_j)$  is the *prior* probability of occurrence of a land use class at a certain location that can be obtained from the rule images of the initial classification. The denominator of Eq. 1 is the sum of all possible cases, where  $n$  is the total number of the land use classes in this study (i.e.  $n = 7$ ).

The expert system algorithm worked forward from the item of evidence to the hypothesis and the search terminated only after all the evidence had been evaluated. All pixels were finally relabeled by the hypothesis that possessed the highest *posterior* probability (i.e.  $P(B_j|A)$ ).

**Table S1** Probability rules used by the Bayesian expert system for land cover/land use mapping

| Item of evidence | Winter-dry rice field | Winter-flooded rice field | Shrub/Grass | Open water | Rain-fed field | Forest | Others |      |
|------------------|-----------------------|---------------------------|-------------|------------|----------------|--------|--------|------|
| Elevation (m)    | < 500                 | 0.4                       | 0.05        | 0.1        | 0.3            | 0.2    | 0.05   | 0.3  |
|                  | 500-600               | 0.3                       | 0.2         | 0.15       | 0.2            | 0.5    | 0.1    | 0.15 |
|                  | 600-800               | 0.25                      | 0.3         | 0.3        | 0.1            | 0.25   | 0.2    | 0.1  |
|                  | 800-1000              | 0                         | 0.05        | 0.05       | 0.1            | 0.02   | 0.15   | 0.05 |
|                  | 1000-1300             | 0.08                      | 0.08        | 0.02       | 0              | 0      | 0.3    | 0.05 |
|                  | >1300                 | 0                         | 0           | 0.03       | 0              | 0      | 0.95   | 0    |
| Terrain position | Gully                 | 0.4                       | 0.4         | 0          | 0.1            | 0      | 0.01   | 0.05 |
|                  | Lower mid-slope       | 0.3                       | 0.2         | 0.1        | 0.1            | 0.1    | 0.25   | 0.1  |
|                  | Mid-slope             | 0.05                      | 0.05        | 0.3        | 0.1            | 0.3    | 0.3    | 0.1  |
|                  | Upper mid-slope       | 0.02                      | 0           | 0.3        | 0              | 0.3    | 0.25   | 0.1  |
|                  | Ridge                 | 0                         | 0           | 0.3        | 0              | 0.3    | 0.2    | 0.1  |

Note: Values of zero in the table were replaced by a very small value close to zero in our calculations

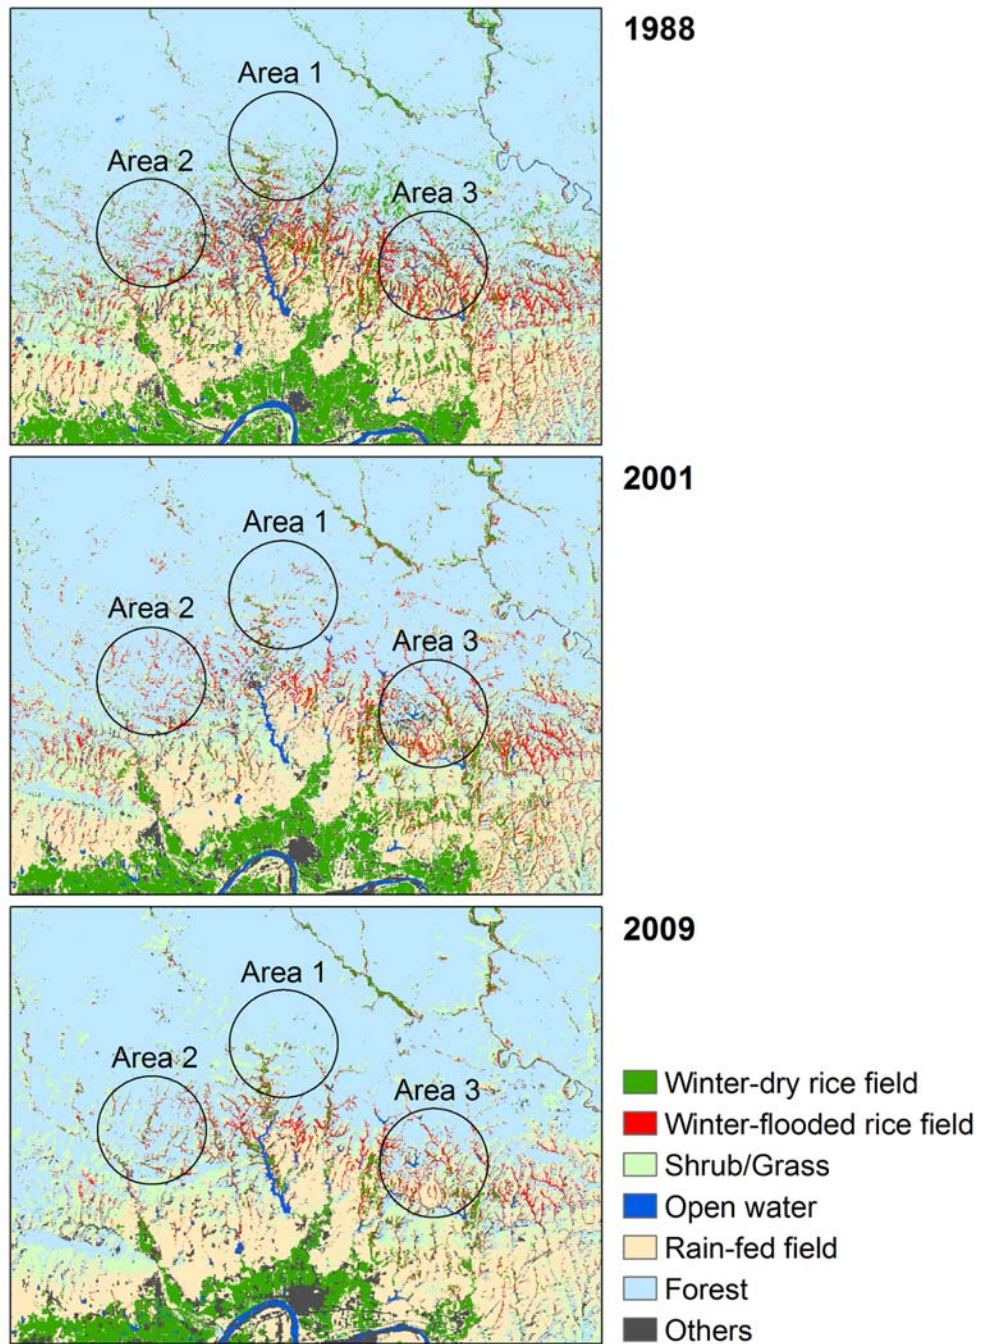

**Fig. S1** Maps of the land cover/use classifications in the whole study area for 1988, 2001 and 2009
